# Supplementary material for: Tracking the evolution of anti-SARS-CoV-2 antibodies and long-term humoral immunity within 2 years after COVID-19 infection
Source: PubMed Central journal article supplement (PMC11167004; doi:10.1038/s41598-024-64414-9), 2024-06-11
Supplement: 41598_2024_64414_MOESM2_ESM.pdf [file 41598_2024_64414_MOESM2_ESM.pdf]

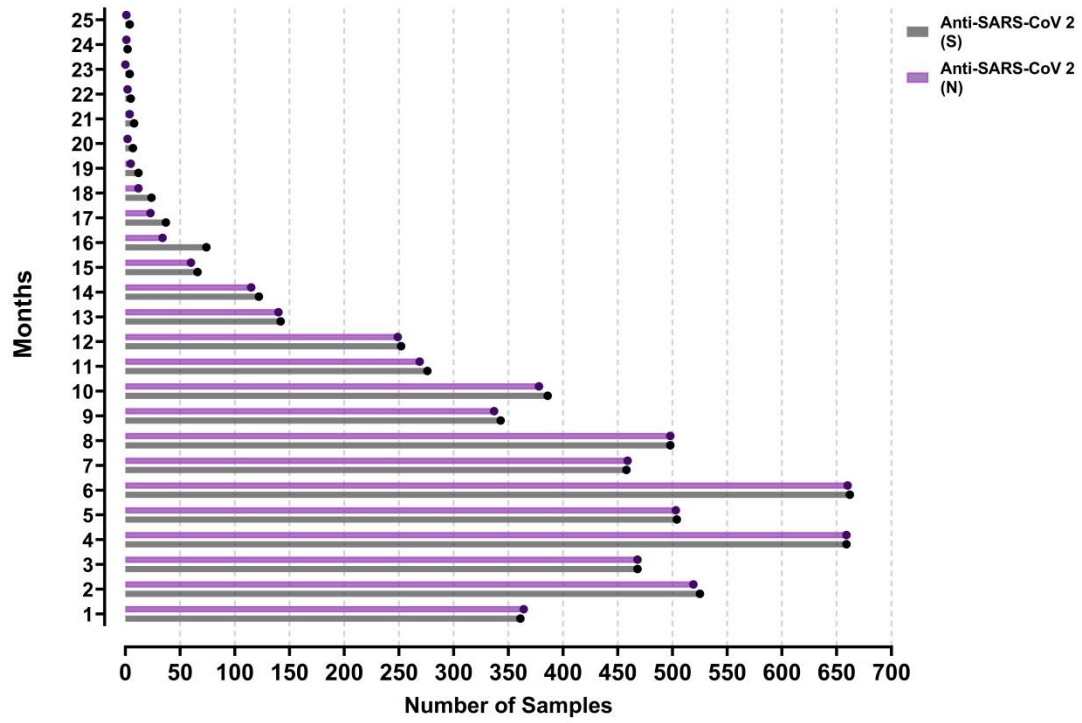

**Supplementary Figure S2.** The subjects involved in the study during 21 months follow up.
