# Supplementary material for: Tracking the evolution of anti-SARS-CoV-2 antibodies and long-term humoral immunity within 2 years after COVID-19 infection
Source: PubMed Central journal article supplement (PMC11167004; doi:10.1038/s41598-024-64414-9), 2024-06-11
Supplement: 41598_2024_64414_MOESM3_ESM.pdf [file 41598_2024_64414_MOESM3_ESM.pdf]

**Supplementary Table S1.** The mean time between samplings and mean number of samples per individuals during study.

|                               | <b>Total</b> |                        | <b>Asymptomatic+Mild</b> |                        | <b>Moderate+Severe</b> |                        | <b>P value</b> |
|-------------------------------|--------------|------------------------|--------------------------|------------------------|------------------------|------------------------|----------------|
|                               | Mean         | Standard Error of Mean | Mean                     | Standard Error of Mean | Mean                   | Standard Error of Mean |                |
| <b>Time between samplings</b> | 52.43        | 1.35                   | 52.85                    | 1.82                   | 51.84                  | 2.01                   | >0.05          |
| <b>Number of samplings</b>    | 3.68         | 0.08                   | 3.54                     | 0.09                   | 3.92                   | 0.13                   | <0.05          |
